# Supplementary material for: Boosting the oxygen reduction reaction using high surface area graphitic-N dominant nitrogen doped carbon
Source: Royal Society of Chemistry journal article supplement (doi:10.1039/d3ta03934j), 2023-01-01
Supplement: d3ta03934j2.pdf [file d3ta03934j2.pdf]

## Supplementary Information

### Boosting Oxygen Reduction Reaction using High Surface Area Graphitic-N Dominant Nitrogen Doped Carbon

Rizwan Haider<sup>1</sup>, Shenqi Ding<sup>1</sup>, Wenrui Wei<sup>1</sup>, Yi Wan<sup>1</sup>, Yu Huang<sup>1</sup>, Renhuan Li<sup>2,\*</sup>, Liang Wu<sup>1</sup>,  
Ayaz Muzammil<sup>1</sup>, Yi Fan<sup>2</sup>, Xianxia Yuan<sup>1,\*</sup>

<sup>1</sup> School of Chemistry and Chemical Engineering, Shanghai Jiao Tong University, Shanghai, 200240, P.R. China

<sup>2</sup> Transportation College, Nanning University, Nanning, 530200, P.R. China

**\* Corresponding authors:**

**Renhuan Li**, lirenhuan@nnxy.edu.cn

**Xianxia Yuan**, yuanxx@sjtu.edu.cn

## Supplementary Equations

The reported potentials against RHE ( $E_{\text{RHE}}$ ) in this work were calculated with equation (S1)

$$E_{\text{RHE}} = E^{\circ}_{\text{SCE}} + 0.0591 \cdot \text{pH} + E_{\text{SCE}} \quad (\text{S1})$$

where  $E^{\circ}_{\text{SCE}}$  is the standard electrode potential for SCE and  $E_{\text{SCE}}$  is the recorded potential against SCE.

The electron transfer number during ORR was obtained from RDE data at various electrode rotation speeds with equations (S2)-(S4),

$$\frac{1}{I} = \frac{1}{I_k} + \frac{1}{I_d} = \frac{1}{I_k} + \frac{1}{B\omega^{1/2}} \quad (\text{S2})$$

$$\frac{1}{I} = \frac{1}{I_k} + \frac{1}{0.62D_0^{2/3}v^{-1/6}nFAc_0\omega^{1/2}} \quad (\text{S3})$$

$$B = 0.62D_0^{2/3}v^{-1/6}nFAc_0 \quad (\text{S4})$$

where  $I$ ,  $I_k$  and  $I_d$  are the current density, kinetic current density and diffusion limiting current density, respectively,  $F$  is Faraday constant ( $96485 \text{ C mol}^{-1}$ ),  $A$  is the electrode area ( $0.1963 \text{ cm}^2$  in this work),  $c_0$  is the oxygen concentration in  $0.1 \text{ M KOH}$  ( $1.22 \times 10^{-6} \text{ mol cm}^{-3}$ ),  $D_0$  is the diffusion coefficient of  $\text{O}_2$  in electrolyte ( $1.9 \times 10^{-5} \text{ cm}^2 \text{ s}^{-1}$ ),  $v$  is the kinematic viscosity ( $0.0113 \text{ cm}^2 \text{ s}^{-1}$ ) in  $0.1 \text{ M KOH}$ , and  $\omega$  is the angular frequency of electrode rotation ( $\text{rad s}^{-1}$ ). According to these equations, the K-L plot of inverse current vs inverse square root of the electrode rotation rate yields a straight line and its slope could be used to give the charge transfer number ( $n$ ).

Kinetic current density ( $J_K$ ) was calculated with equation (S5),

$$J_K = \frac{J_L \times J_{0.80}}{J_L - J_{0.80}} \quad (\text{S5})$$

where  $J_L$  is the limiting current density ( $\text{mA cm}^{-2}$ ) at  $0.45 \text{ V}$ , and  $J_{0.80}$  stands for the current density ( $\text{mA cm}^{-2}$ ) at  $0.80 \text{ V}$  in LSV curves recorded at  $1600 \text{ rpm}$ .

The calculation of electron transfer number ( $n$ ) and percentage yield of hydrogen peroxide ( $\text{H}_2\text{O}_2\%$ ) during ORR from RRDE data were carried out by using equation (S6) and (S7), respectively.

$$n = 4 \times \frac{i_d}{i_d + (i_r/N)} \quad (\text{S6})$$

$$\text{H}_2\text{O}_2\% = 200 \times \frac{i_r/N}{i_d + (i_r/N)} \quad (\text{S7})$$

where  $i_d$  is the disk current,  $i_r$  is the ring current and  $N$  is collection efficiency of ring electrode (which is  $0.37$  as provided by the supplier).

The dissociative mechanism for ORR

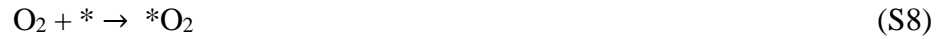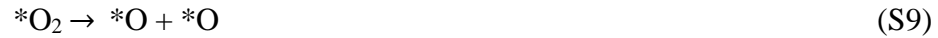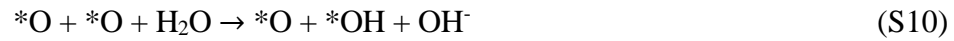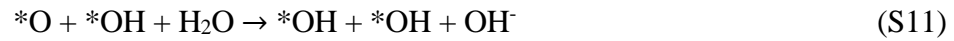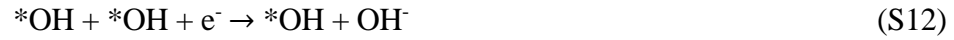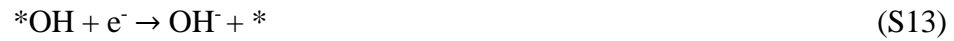

The associative mechanism for ORR

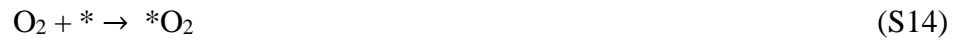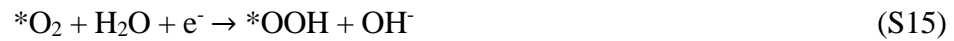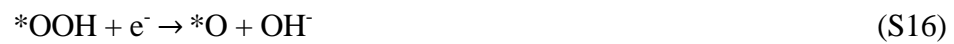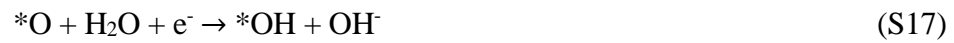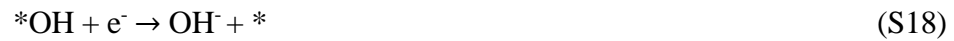

Supplementary Figures

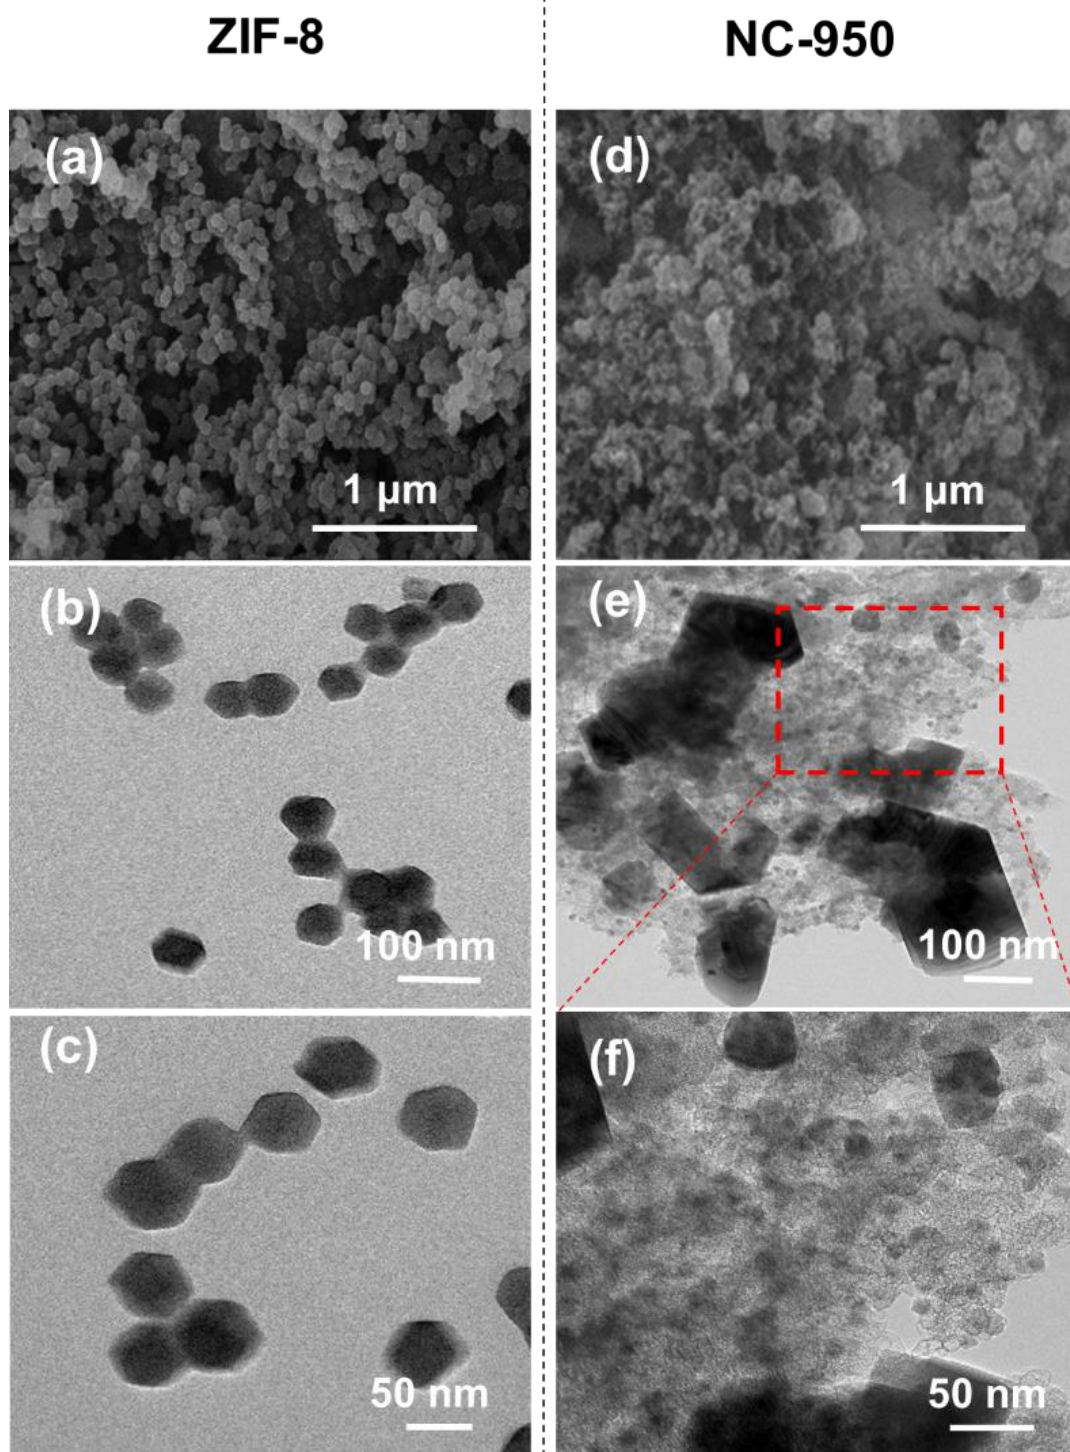

**Figure S1.** SEM of (a) ZIF-8 and (d) NC-950. TEM of (b,c) ZIF-8 and (e,f) NC-950.

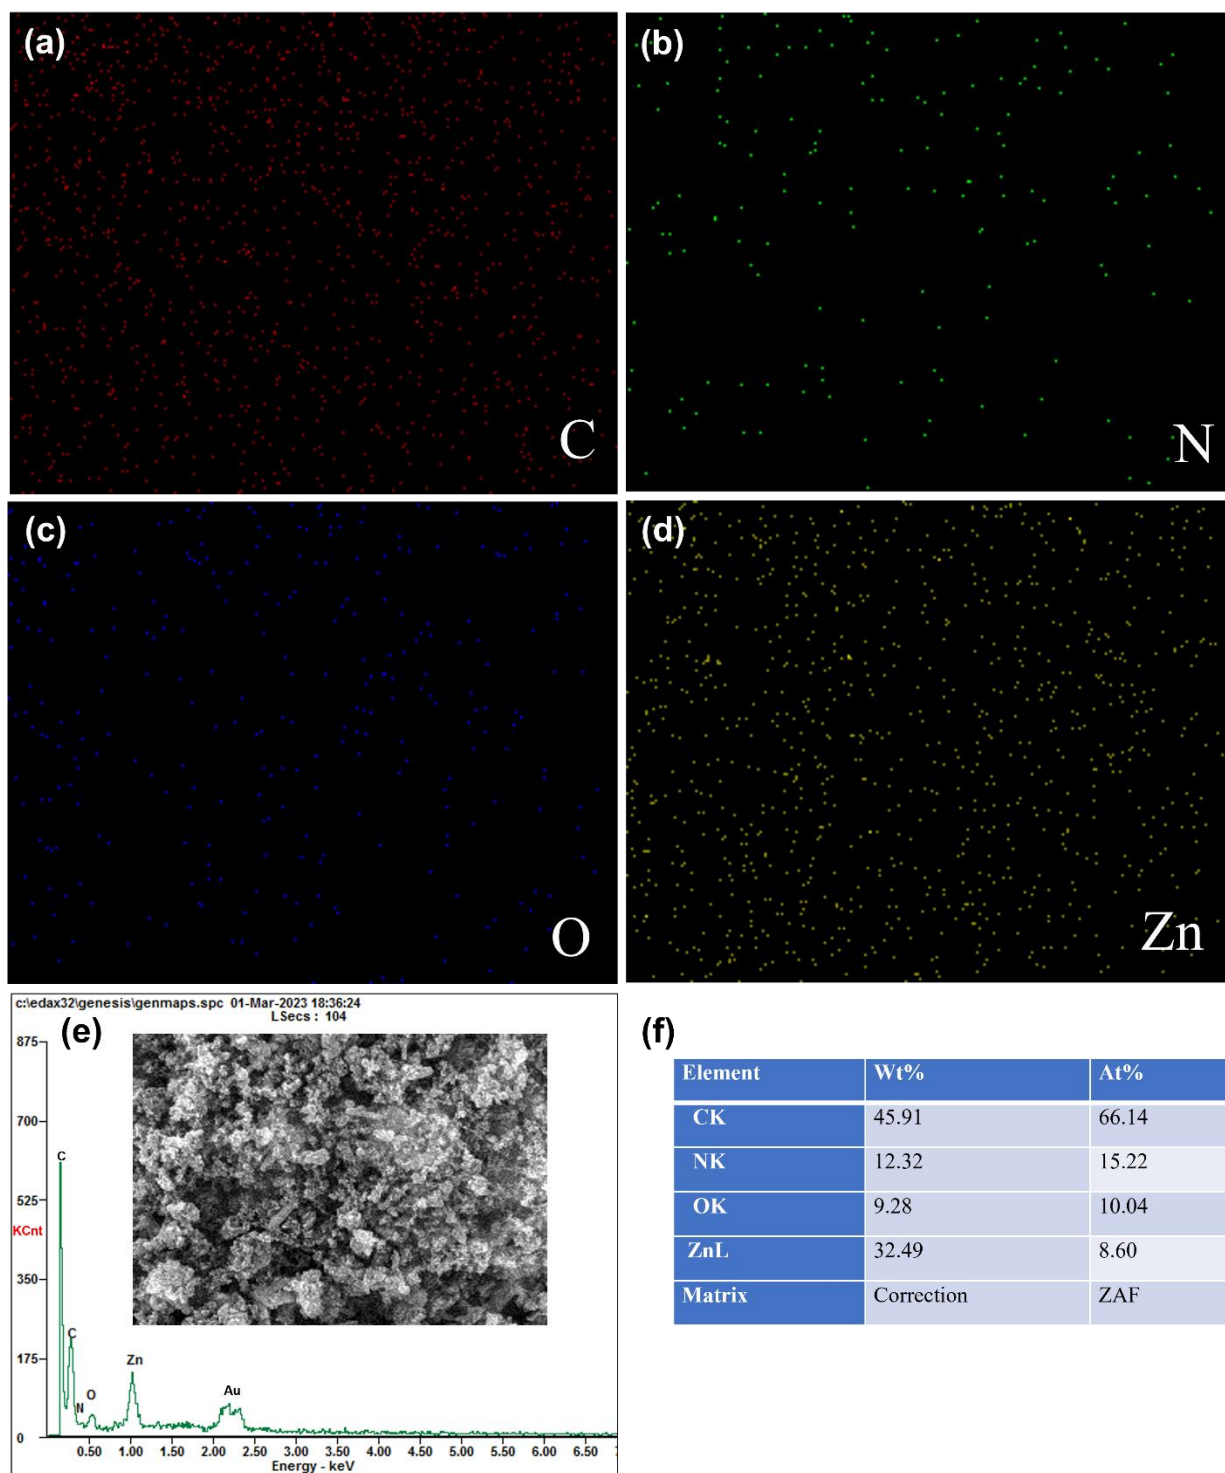

**Figure S2.** EDS mapping presenting (a) C, (b) N, (c) O and (d) Zn in NC-950. (e) EDS spectra with the image as inset and (f) Wt.% and At.% of C, N, O and Zn in NC-950.

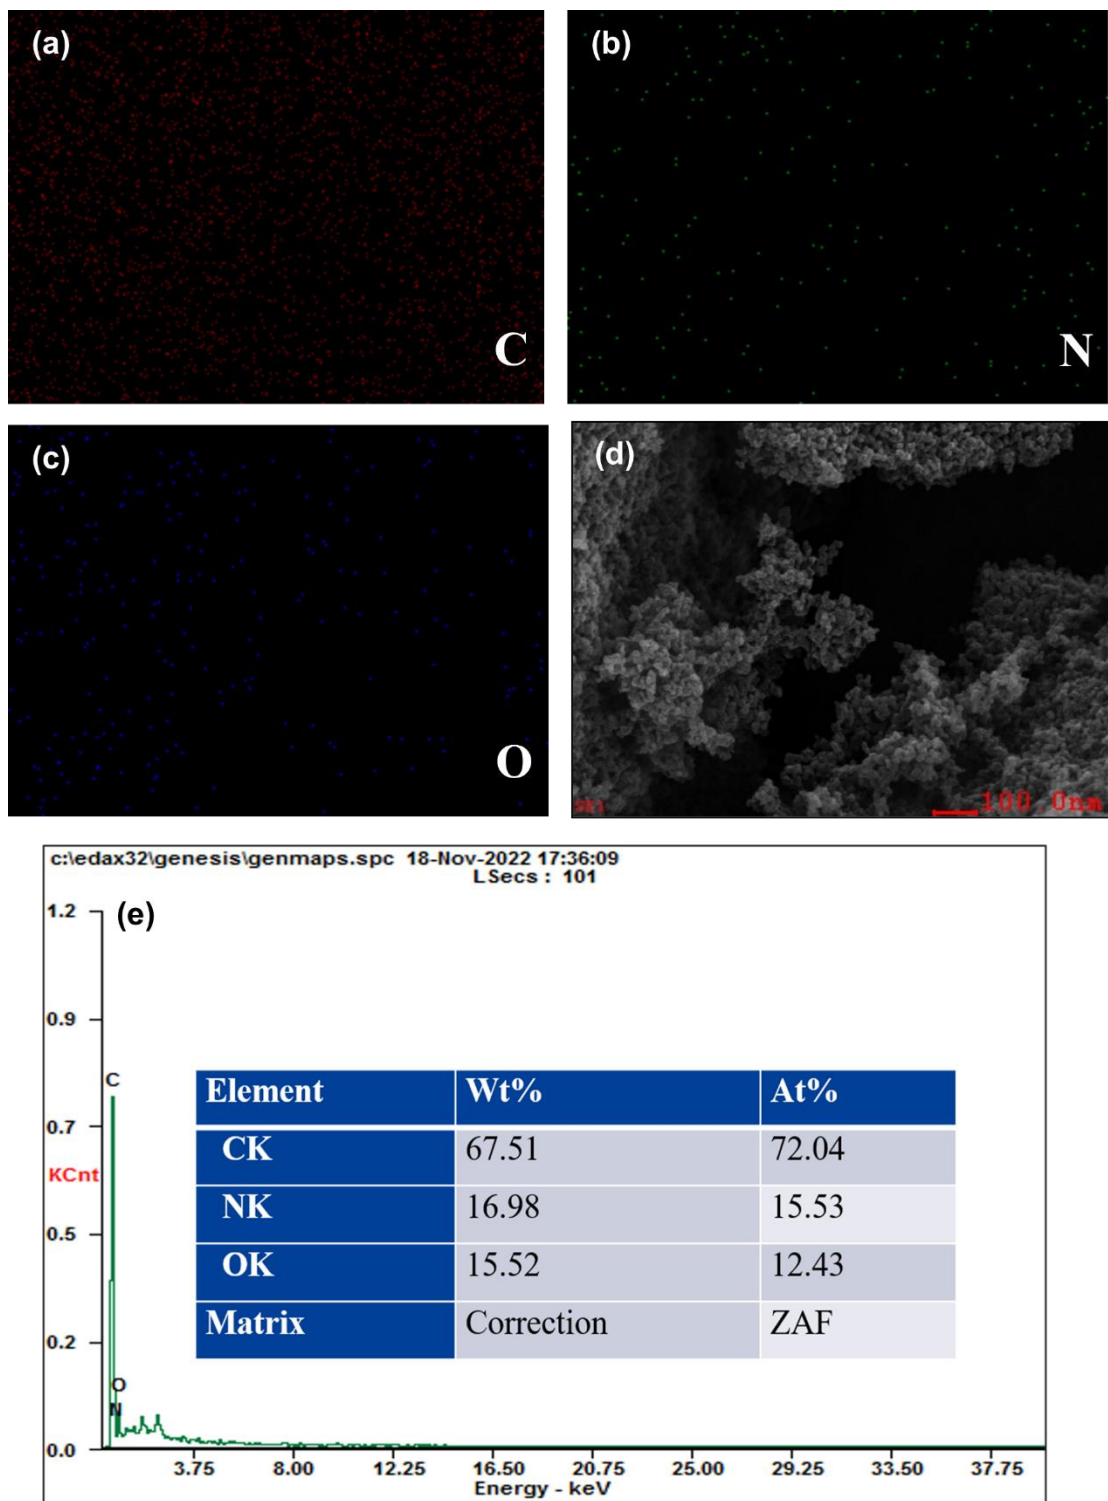

**Figure S3.** EDS mapping presenting (a) C, (b) N, and (c) O in NC-1000. (d) EDS image and (e) the spectra along with Wt.% and At.% of C, N and O in NC-1000.

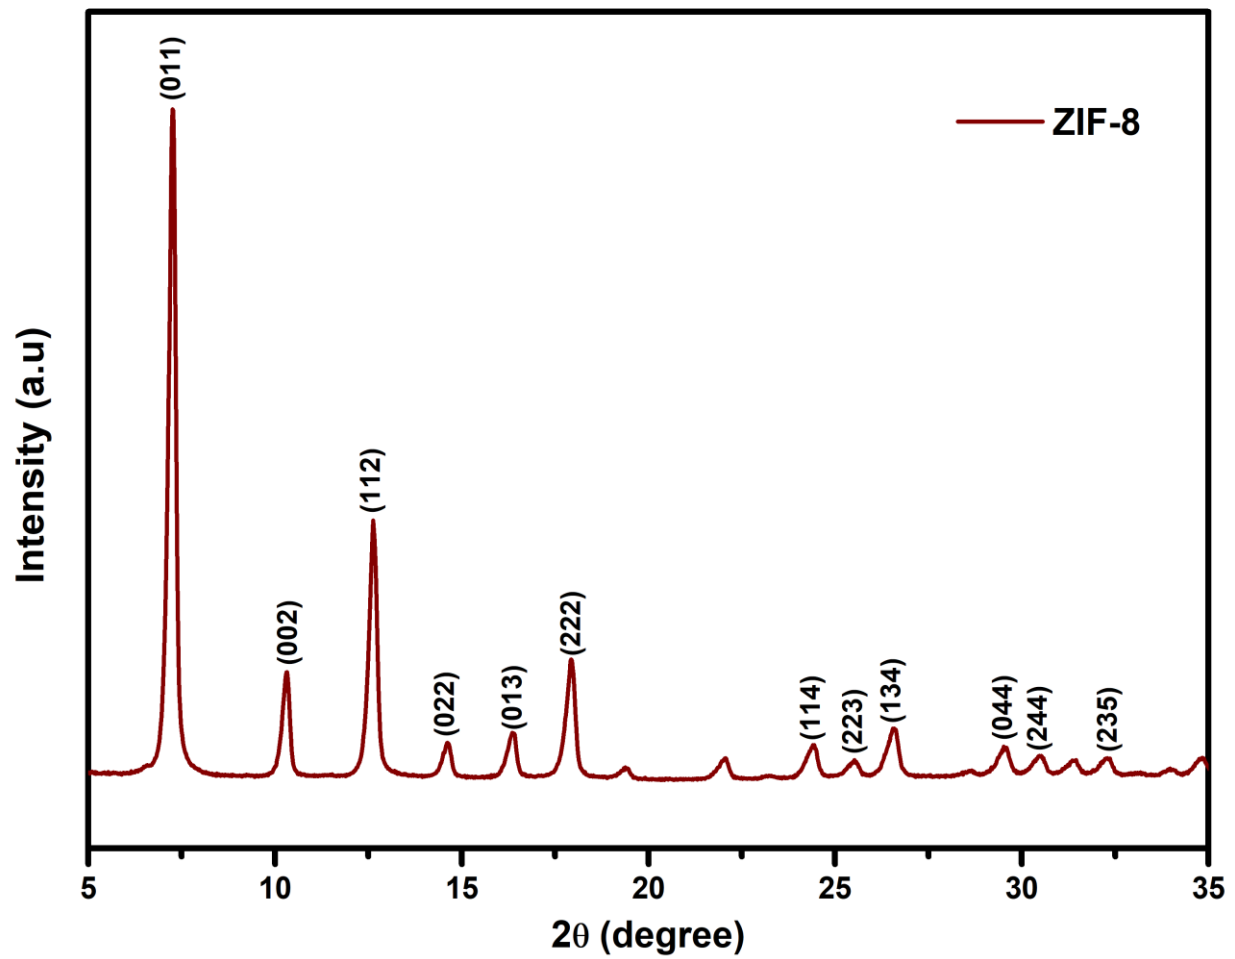

Figure S4. XRD pattern of ZIF-8.

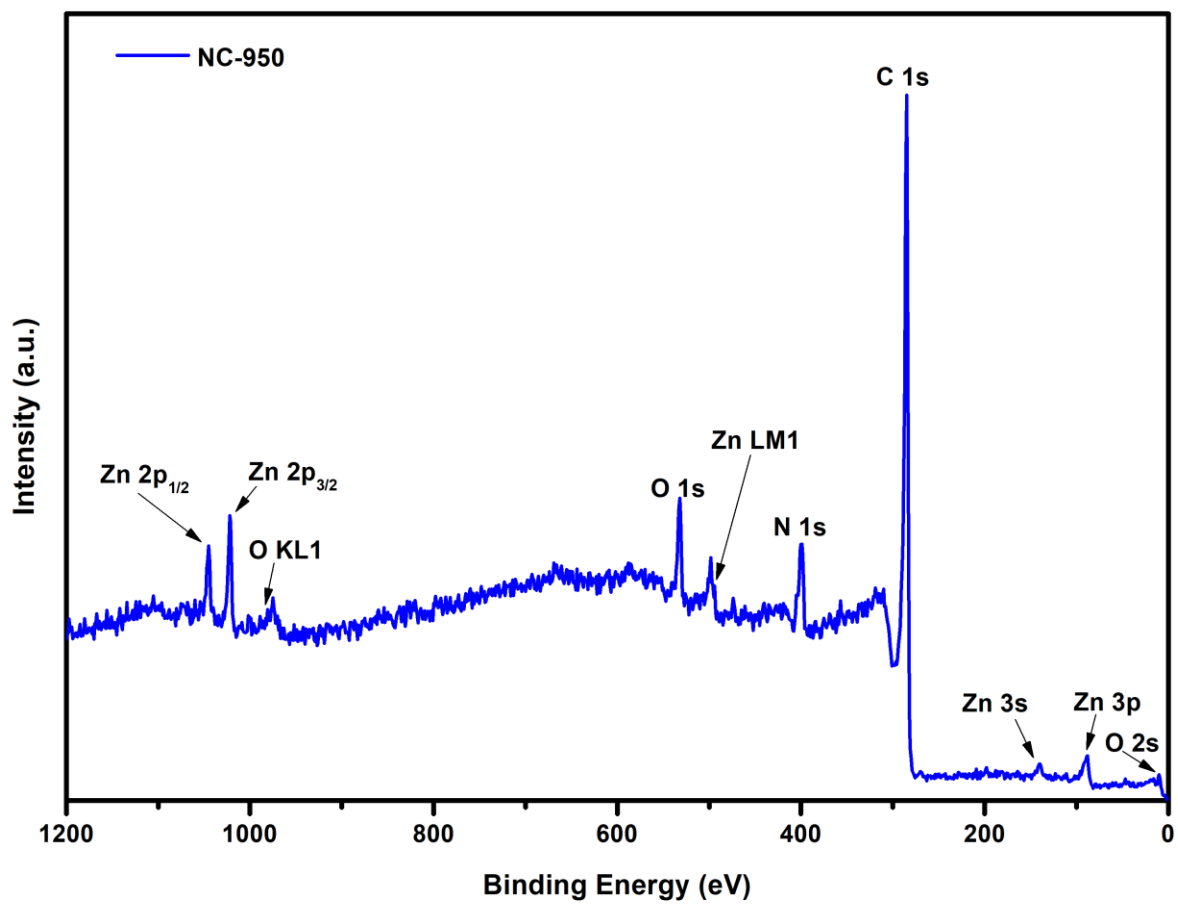

**Figure S5.** XPS survey spectrum of NC-950.



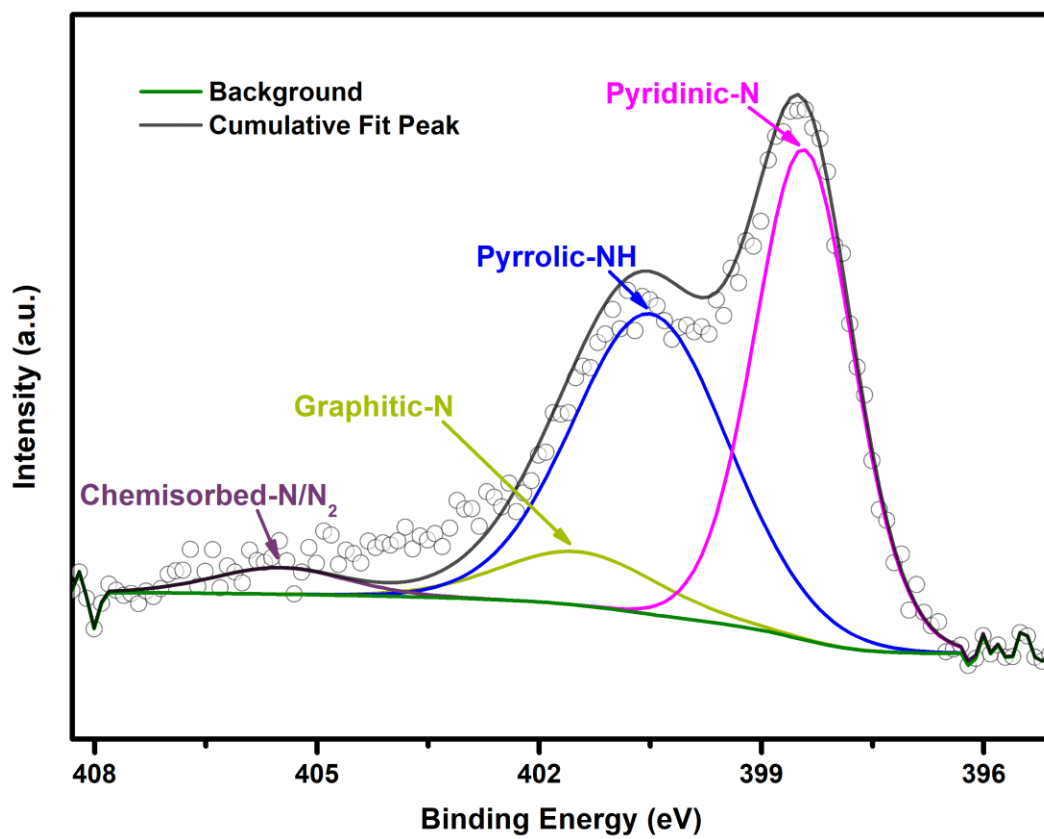

**Figure S6.** Deconvoluted N 1s spectra of NC-950.

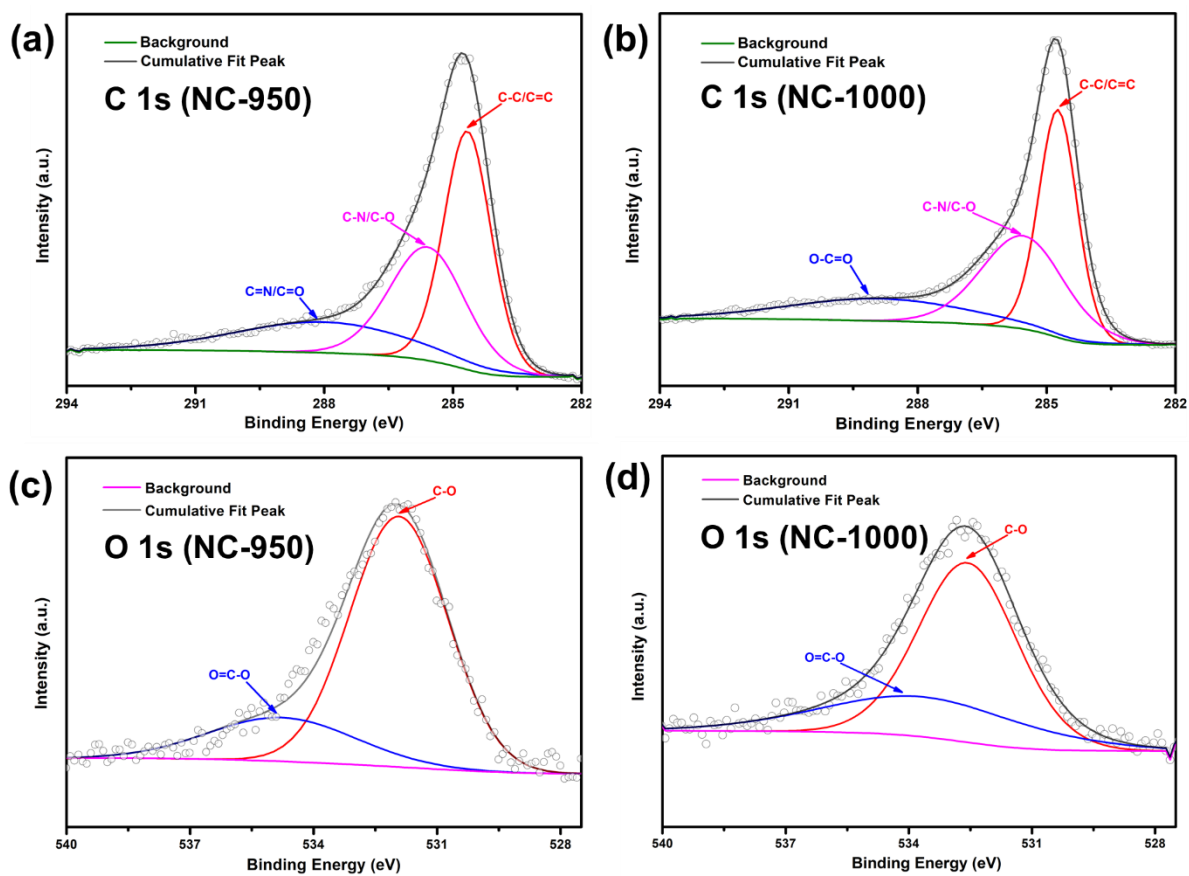

**Figure S7.** Deconvoluted XPS spectra of (a,b) C 1s and (c,d) O 1s for NC-950 (a, c) and NC-1000 (b, d).

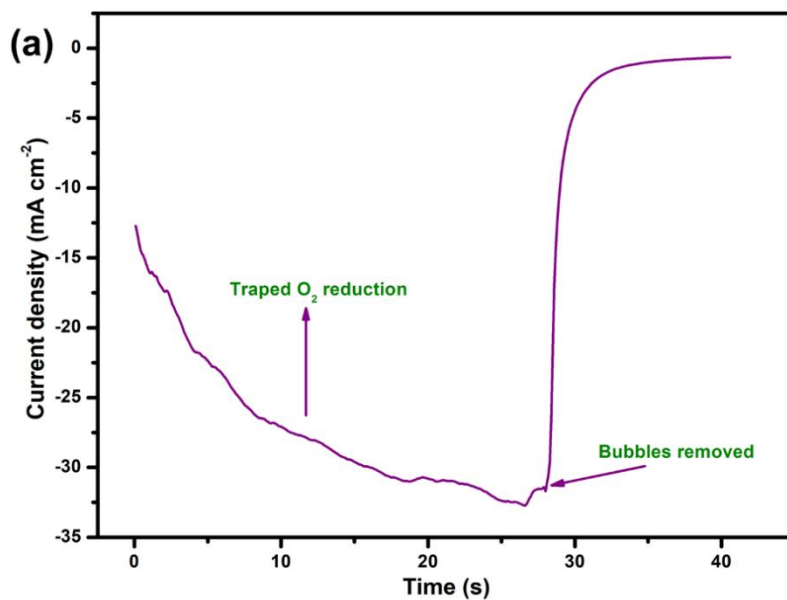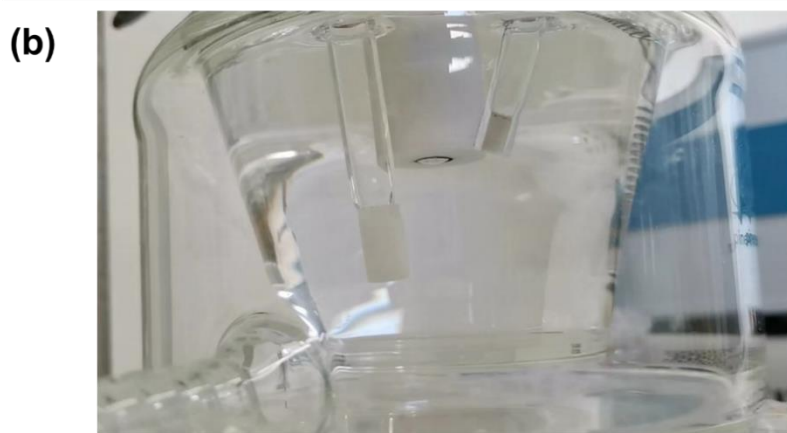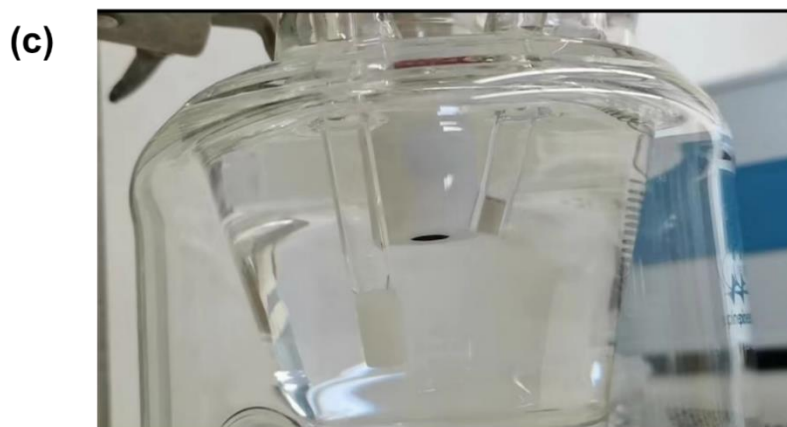

**Figure S8.** (a) The trapped O<sub>2</sub> reduction current density vs. time during the bubble removal treatment by applying a high reducing voltage of 0.37 V, and a visual representation of the electrode surface (a) before and (b) after the bubble removal experiment.

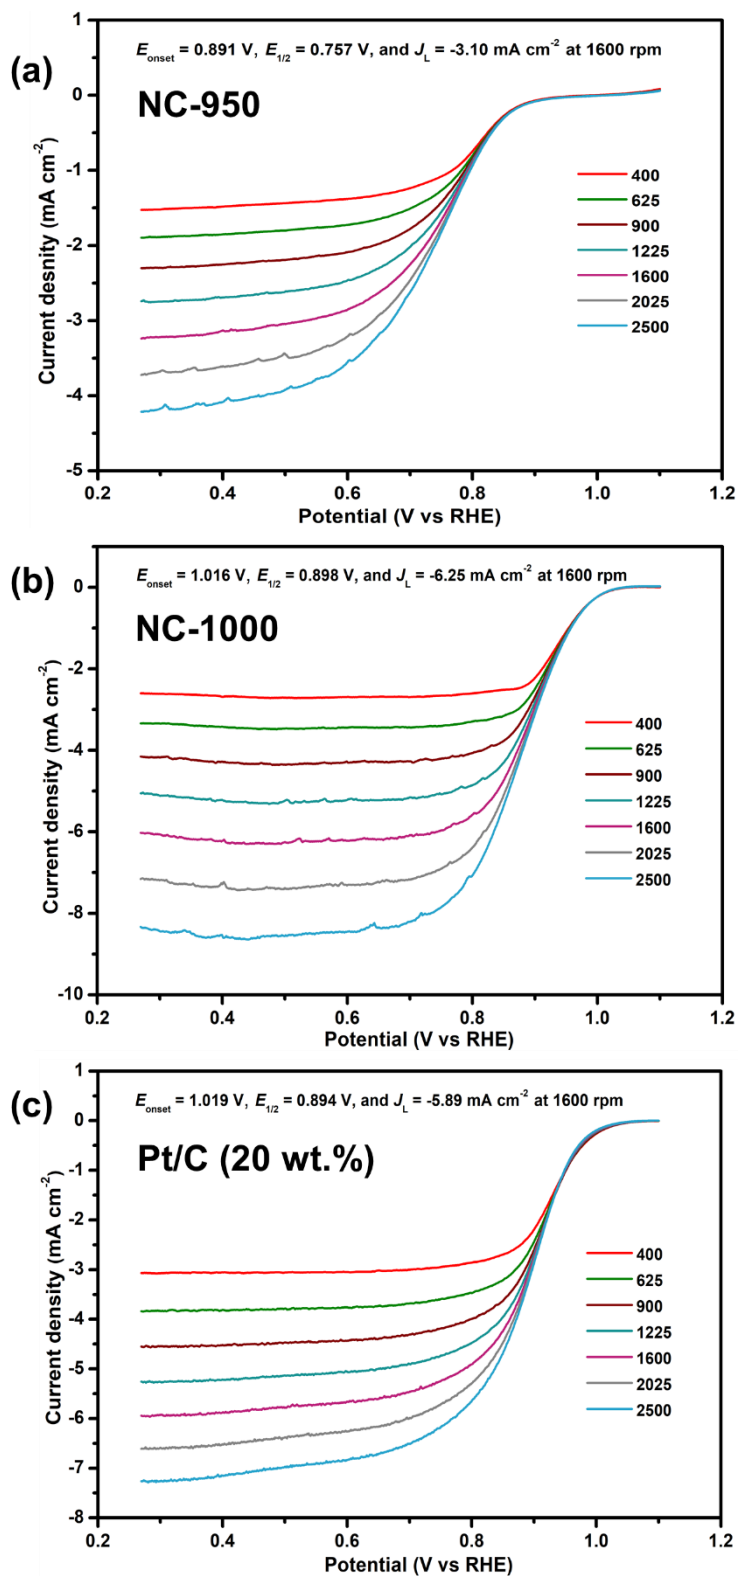

**Figure S9.** LSV curves of (a) NC-950, (b) NC-1000 and (c) Pt/C (20 wt.%) recorded in O<sub>2</sub> saturated 0.1 M KOH solution at electrode rotating rates of 400-2500 rpm.

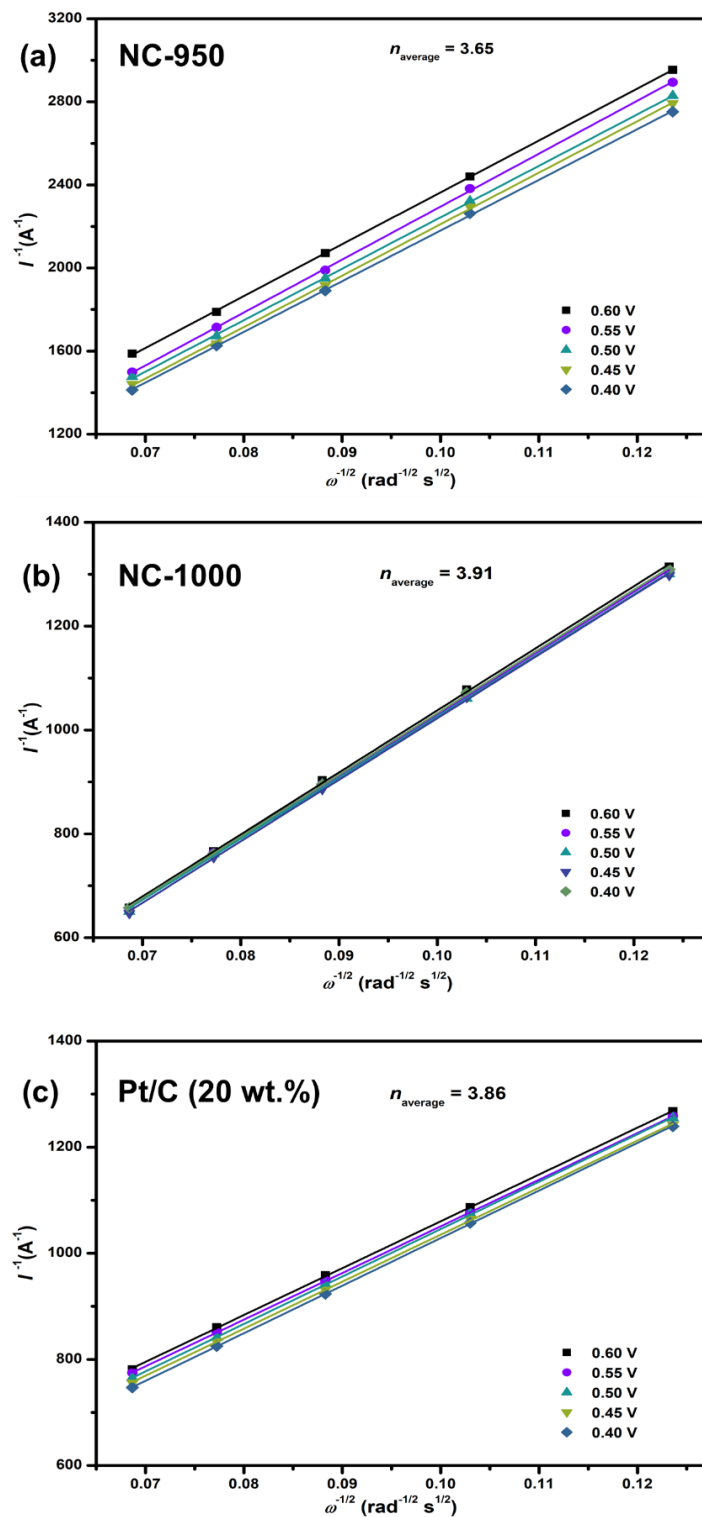

**Figure S10.** K-L plots derived from the LSV curves in Fig. S8 for (a) NC-950, (b) NC-1000 and (c) Pt/C (20 wt.%) at 625 to 2025 rpm.

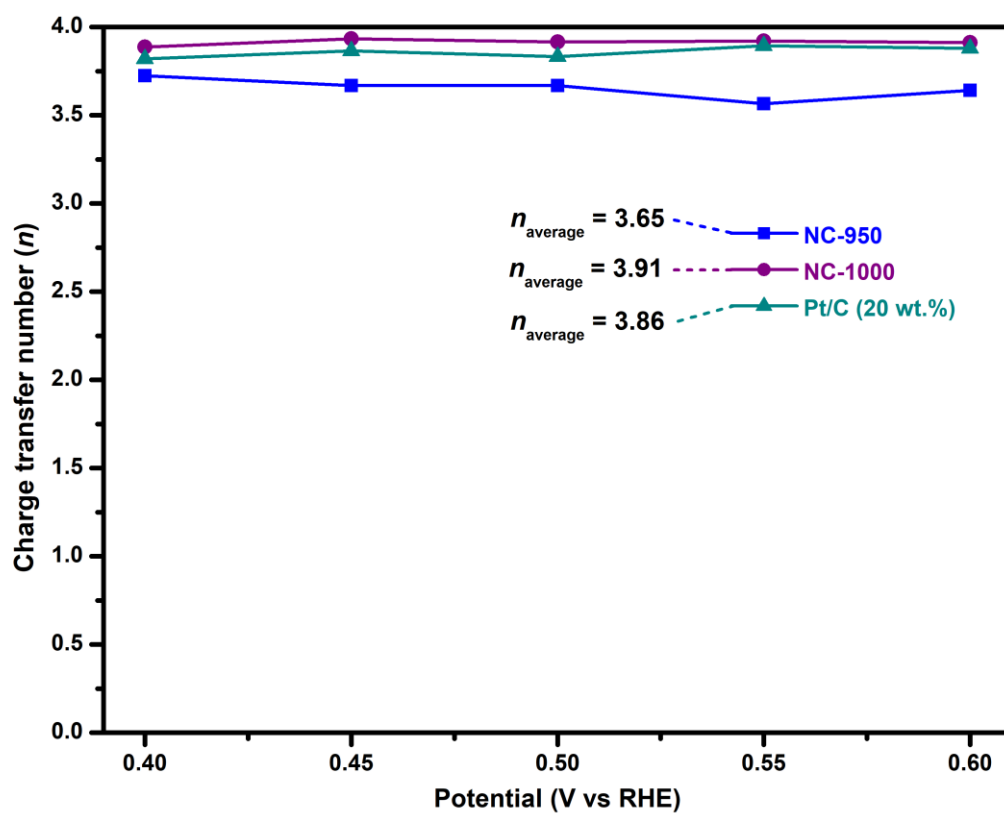

**Figure S11.** Potential dependence of the charge transfer number calculated from the K-L plots in Fig. S10 for NC-950, NC-1000 and Pt/C (20 wt.%).

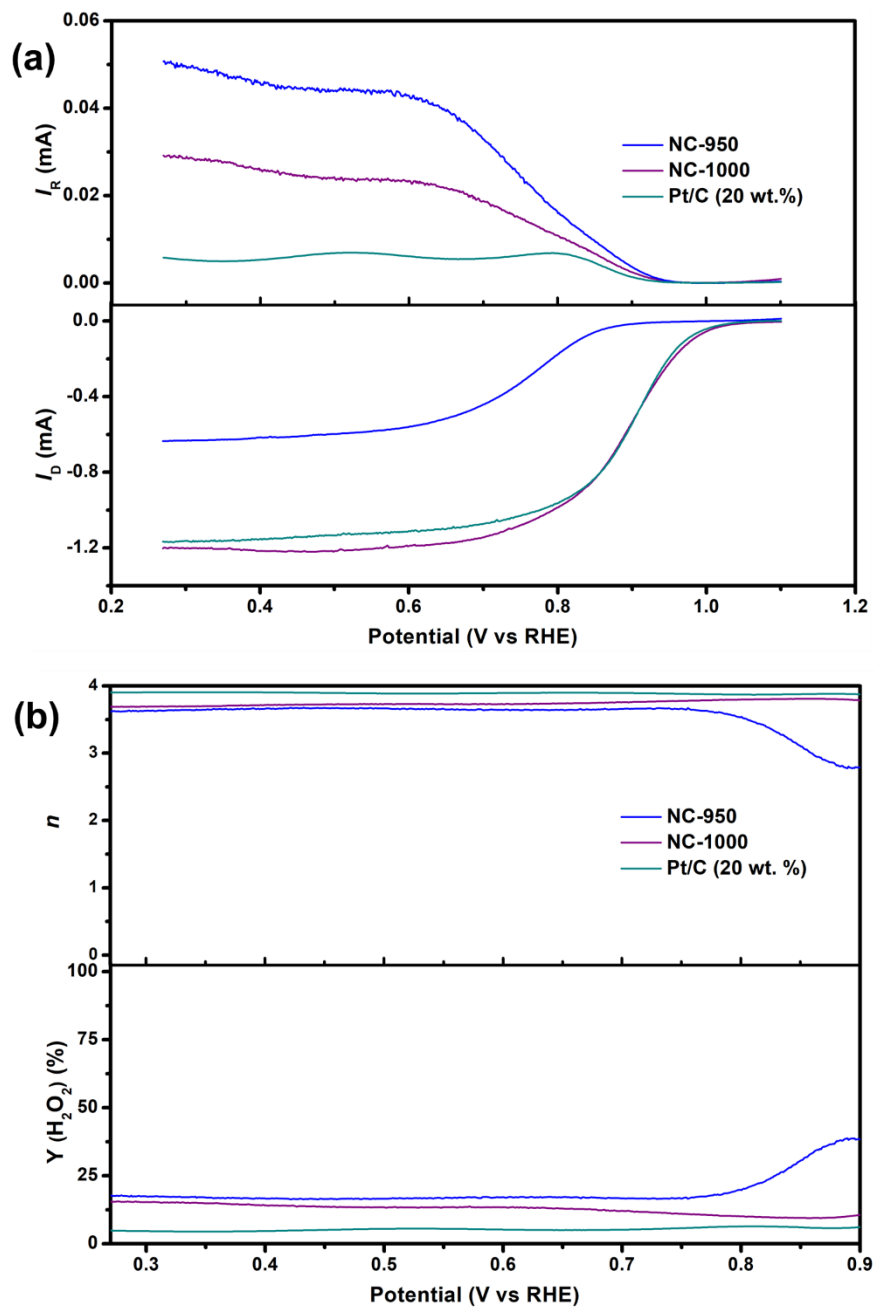

**Figure S12.** (a) RRDE data and the (b) calculated charge transfer number ( $n$ ) and  $H_2O_2$  (%) yield for NC-950, NC-1000 and Pt/C (20 wt.%).

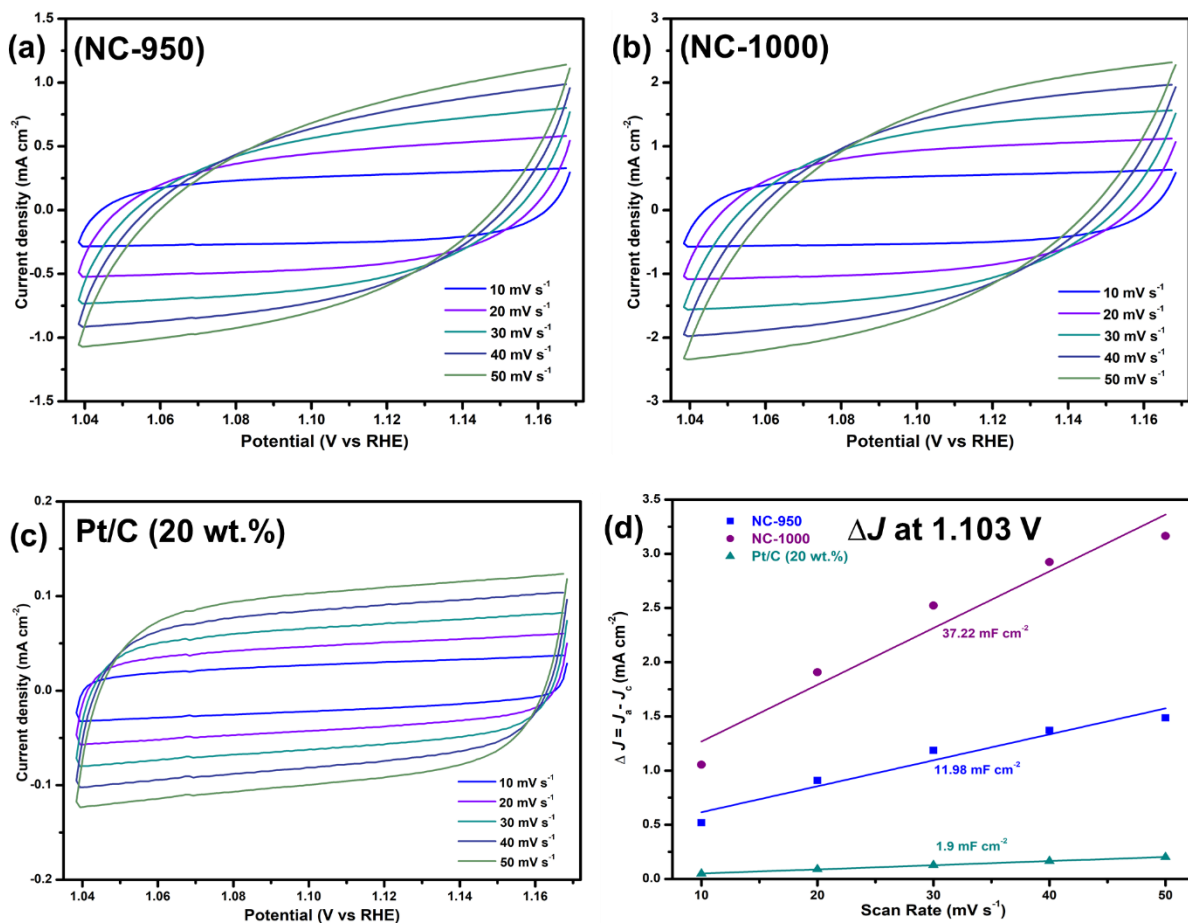

**Figure S13.** CV curves in the non-Faradic region for (a) NC-950, (b) NC-1000 and (c) Pt/C (20 wt.%) at various scan rates. (d) Line fitted plots of scan rate vs  $\Delta J$  at 1.103 V for the estimation of double layer capacitance ( $C_{dl}$ ).



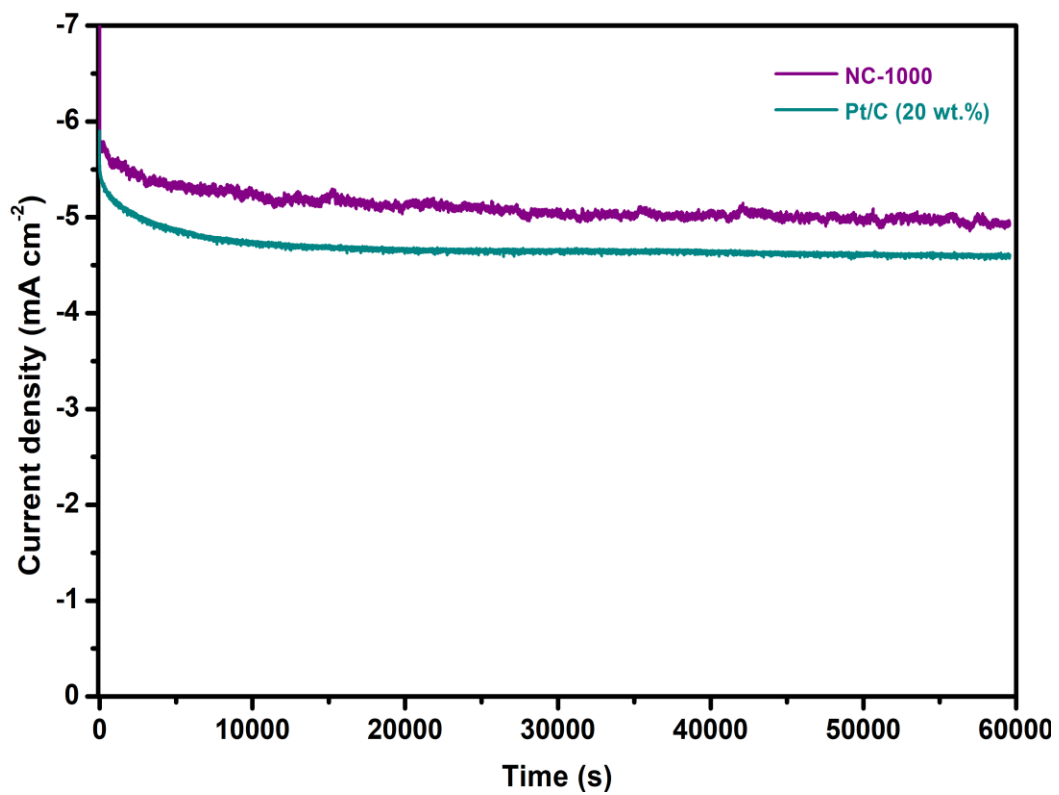

**Figure S14.** Chronoamperometric current density of NC-1000 and Pt/C (20 wt.%) after 60000 s operation at 0.6 V with 1600 rpm in O<sub>2</sub> saturated 0.1 M KOH solution.

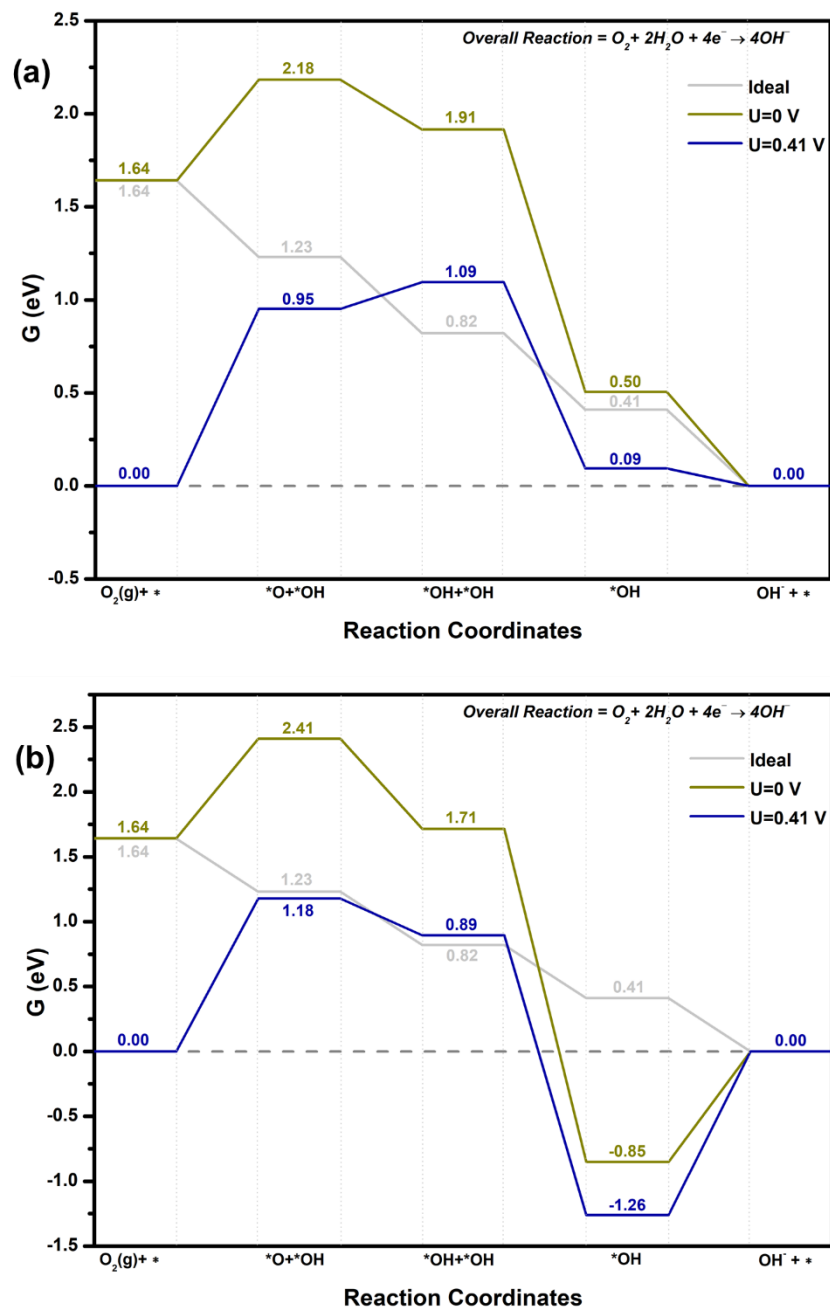

**Figure S15.** Gibbs free energy for various reaction intermediates following dissociative ORR mechanism in alkaline electrolyte on (a) graphitic N sites and (b) pyridinic-N sites present in NC-1000.

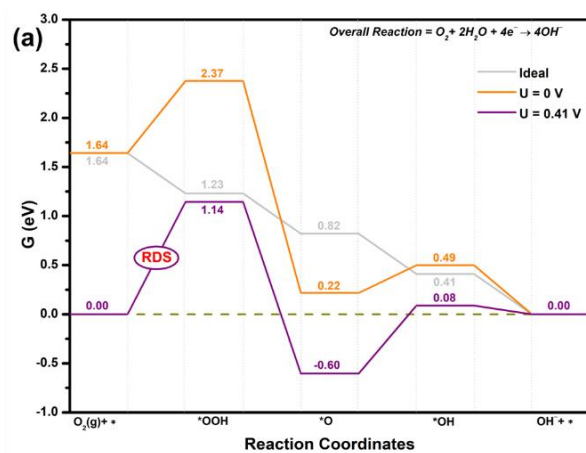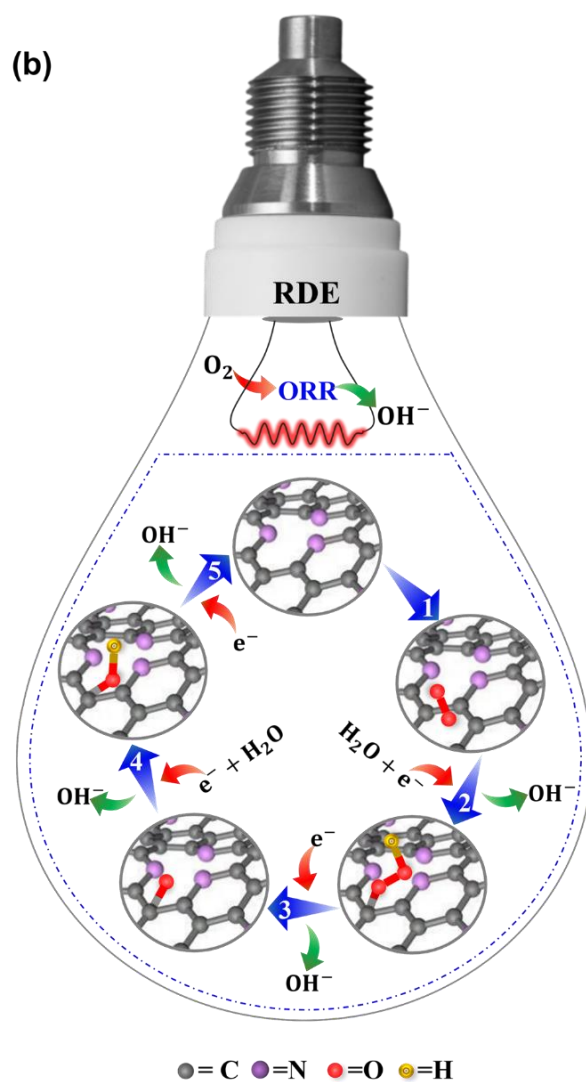

**Figure S16.** (a) Gibbs free energy for various reaction intermediates following associative ORR mechanism in alkaline electrolyte and (b) the proposed ORR mechanism on pyridinic-N sites present in NC-1000.

**Table S1.** ORR performance comparison of NC-1000 with recently reported nitrogen doped carbon catalysts in 0.1 M KOH solution except for Ref. 15, where 1 M KOH was used. All the voltages are mentioned against RHE.

| Journal name<br>(Publication year)  | Material Name              | $E_{\text{Onset}}$<br>(V) | $E_{1/2}$<br>(V) | $J_L$<br>(mA cm <sup>-2</sup> ) | Tafel slope<br>(mV dec <sup>-1</sup> ) | Stability                     | Durability<br>( $E_{1/2}$ loss)  | Ref. |
|-------------------------------------|----------------------------|---------------------------|------------------|---------------------------------|----------------------------------------|-------------------------------|----------------------------------|------|
| This work                           | NC-1000                    | 1.016                     | 0.898            | 6.25                            | 38.5                                   | 85.74 % at 0.6V<br>(60000 s)  | 26 mV<br>(5000 cycles)           |      |
| ChemElectroChem<br>(2019)           | 100N8/HTC                  | 0.90                      | 0.81             | 3.90                            | 65                                     | 100 % at 0.81 V<br>(3600 s)   | ----                             | 1    |
| Catal. Today<br>(2019)              | CS-HPCNS-<br>1000-5        | 0.99                      | 0.79             | 3.75                            | ----                                   | 87 % at 0.77 V<br>(12000 s)   | ----                             | 2    |
| Appl. Catal. B.<br>(2019)           | nitrogen-doped<br>graphene | 0.96                      | 0.83             | 4.90                            | 60                                     | ----                          | No loss<br>(5000 cycles)         | 3    |
| Chem. Eng. J.<br>(2022)             | h-N-CFs-800                | 1.01                      | 0.87             | 5.86                            | 79.3                                   | 93.4 % at 0.7 V<br>(6000 s)   | 14 mV<br>(5000 cycles)           | 4    |
| Chem. Eng. J.<br>(2022)             | PNC-30                     | 1.00                      | 0.90             | 6.10                            | 57                                     | 96 % at 0.4 V<br>(60000 s)    | ----                             | 5    |
| J. Colloid Interface Sci.<br>(2020) | PS-900                     | 1.00                      | 0.85             | 5.84                            | 68                                     | 100 % at 0.67 V<br>(50000 s)  | ----                             | 6    |
| Chem. Eur. J.<br>(2020)             | 2DPCs-a                    | 0.93                      | 0.83             | 5.30                            | 64                                     | 80.2%, at 0.75 V<br>(35000 s) | ----                             | 7    |
| Nat. Commun.<br>(2018)              | N-HsGDY-900                | 1.02                      | 0.85             | 6.20                            | 64.4                                   | 100 % at 0.7 V<br>(36000 s)   | Negligible loss<br>(5000 cycles) | 8    |
| ACS Omega<br>(2020)                 | AWC-1                      | 0.92                      | 0.85             | 5.00                            | 55.6                                   | ----                          | No loss<br>(5000 cycles)         | 9    |
| Nanoscale Res. Lett.<br>(2019)      | Me-CFZ-900                 | 0.99                      | 0.86             | 5.10                            | ----                                   | ----                          | 21 mV<br>(5000 cycles)           | 10   |
| J. Colloid Interface Sci.<br>(2022) | CMP-NP-900                 | 0.93                      | 0.86             | 4.45                            | ----                                   | 89.6 % at 0.7 V<br>(10000 s)  | Negligible loss<br>(3000 cycles) | 11   |
| J. Adv. Ceram.<br>(2021)            | NPC-1000                   | 0.925                     | 0.86             | 4.90                            | 64.9                                   | 78 % at 0.65 V<br>(28800 s)   | ----                             | 12   |
| Carbon<br>(2023)                    | D-NCNS                     | 1.05                      | 0.873            | 5.65                            | 98.2                                   | ----                          | 18 mV<br>(12000 cycles)          | 13   |

|                                |            |       |       |      |      |                               |                         |    |
|--------------------------------|------------|-------|-------|------|------|-------------------------------|-------------------------|----|
| Energy Environ. Sci.<br>(2019) | NCN-1000-5 | 0.95  | 0.82  | 6.43 | 86   | 85.6 % at 0.67 V<br>(12000 s) | ----                    | 14 |
| Sci. Adv.<br>(2016)            | N-GRW      | 0.92  | 0.84  | 3.50 | 53   | 90 % at 0.7 V<br>(43200 s)    | 15 mV<br>(2000 cycles)  | 15 |
| Carbon<br>(2020)               | N-hG       | 0.91  | 0.833 | 5.25 | 78   | 90.7 % at 0.6 V<br>(10000 s)  | ----                    | 16 |
| Angew Chem<br>(2019)           | PD-C       | 0.911 | 0.833 | 4.80 | ---- | 96 % at 0.67 V<br>(10000 s)   | ----                    | 17 |
| Adv. Funct. Mater.<br>(2021)   | NCF        | 1.00  | 0.85  | 6.00 | 71   | 88.9 % at 0.7 V<br>(86400 s)  | ----                    | 18 |
| Appl. Catal. B.<br>(2020)      | N-CNT-3 h  | 0.95  | 0.83  | 5.70 | 89   | ----                          | 13 mV<br>(10000 cycles) | 19 |

## References

1. A. Wütscher, T. Eckhard, D. Hiltrop, K. Lotz, W. Schuhmann, C. Andronescu and M. Muhler, *ChemElectroChem*, 2019, **6**, 514-521.
2. P. Cao, Y. Liu, X. Quan, J. Zhao, S. Chen and H. Yu, *Catalysis Today*, 2019, **327**, 366-373.
3. N. Komba, Q. Wei, G. Zhang, F. Rosei and S. Sun, *Applied Catalysis B: Environmental*, 2019, **243**, 373-380.
4. S. Li, Y. Wang, Y. Ding, Y. He, Y. Zhang, S. Li, J. Zhang and Y. Chen, *Chemical Engineering Journal*, 2022, **430**, 132969.
5. B. Liu, F. Liu, D. Lu, S. Zhang, C. Zhang, Z. Gao, L. Shi, Y. Liu, J. X. Shi and L. Zhang, *Chemical Engineering Journal*, 2022, **430**, 132762.
6. L. Yu, C. Yang, W. Zhang, W. Liu, H. Wang, J. Qi and L. Xu, *Journal of Colloid and Interface Science*, 2020, **575**, 406-415.
7. K. Tu, L. Zou, C. Yang, Y. Su, C. Lu, J. Zhu, F. Zhang, C. Ke and X. Zhuang, *Chemistry—A European Journal*, 2020, **26**, 6525-6534.
8. Q. Lv, W. Si, J. He, L. Sun, C. Zhang, N. Wang, Z. Yang, X. Li, X. Wang and W. Deng, *Nature Communications*, 2018, **9**, 3376.
9. K. t. Kaare, E. Yu, A. Volperts, G. Dobeles, A. Zhurinsh, A. Dyck, G. Niaura, L. Tamasauskaite-Tamasiunaite, E. Norkus and M. Andrulevičius, *ACS Omega*, 2020, **5**, 23578-23587.
10. C. Guo, Y. Li, Y. Xu, Q. Xiang, L. Sun, W. Zhang, W. Li, Y. Si and Z. Luo, *Nanoscale Research Letters*, 2019, **14**, 1-11.
11. H. Sun, P. Zhou, X. Ye, J. Wang, Z. Tian, Z. Zhu, C. Ma, W. Liang and A. Li, *Journal of Colloid and Interface Science*, 2022, **617**, 11-19.
12. Z. Mo, W. Yang, S. Gao, J. K. Shang, Y. Ding, W. Sun and Q. Li, *Journal of Advanced Ceramics*, 2021, **10**, 714-728.
13. H. Gao, S. Wang, W.-C. M. Cheong, K. Wang, H. Xu, A. Huang, J. Ma, J. Li, W.-F. A. Ip and K. San Hui, *Carbon*, 2023, **203**, 76-87.
14. H. Jiang, J. Gu, X. Zheng, M. Liu, X. Qiu, L. Wang, W. Li, Z. Chen, X. Ji and J. Li, *Energy & Environmental Science*, 2019, **12**, 322-333.
15. H. B. Yang, J. Miao, S.-F. Hung, J. Chen, H. B. Tao, X. Wang, L. Zhang, R. Chen, J. Gao and H. M. Chen, *Science Advances*, 2016, **2**, e1501122.
16. Y. Bian, H. Wang, J. Hu, B. Liu, D. Liu and L. Dai, *Carbon*, 2020, **162**, 66-73.
17. J. Zhu, Y. Huang, W. Mei, C. Zhao, C. Zhang, J. Zhang, I. S. Amiinu and S. Mu, *Angewandte Chemie International Edition*, 2019, **58**, 3859-3864.
18. L. Zhang, T. Gu, K. Lu, L. Zhou, D. S. Li and R. Wang, *Advanced Functional Materials*, 2021, **31**, 2103187.
19. S. Yi, X. Qin, C. Liang, J. Li, R. Rajagopalan, Z. Zhang, J. Song, Y. Tang, F. Cheng and H. Wang, *Applied Catalysis B: Environmental*, 2020, **264**, 118537.
